# Supplementary material for: The integrin ligand SVEP1 regulates GPCR‐mediated vasoconstriction via integrins α9β1 and α4β1
Source: PubMed Central journal article supplement (PMC9805129; doi:10.1111/bph.15921), 2022-08-02
Supplement: BPH-179-4958-s002.pdf [file BPH-179-4958-s002.pdf]

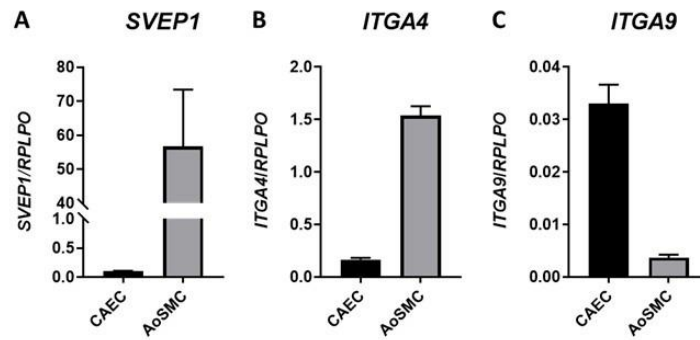

**Supplemental Figure 1: SVEP1 and integrin expression in the vasculature**  
 (A) *SVEP1*, (B) *ITGA4* and (C) *ITGA9* mRNA expression was measured using qRT-PCR in human coronary artery endothelial cells (CAEC) and vascular smooth muscle cells (VSMC). Results are normalised to the reference gene *RPLPO*. Data are represented as means  $\pm$  SD, n=3.

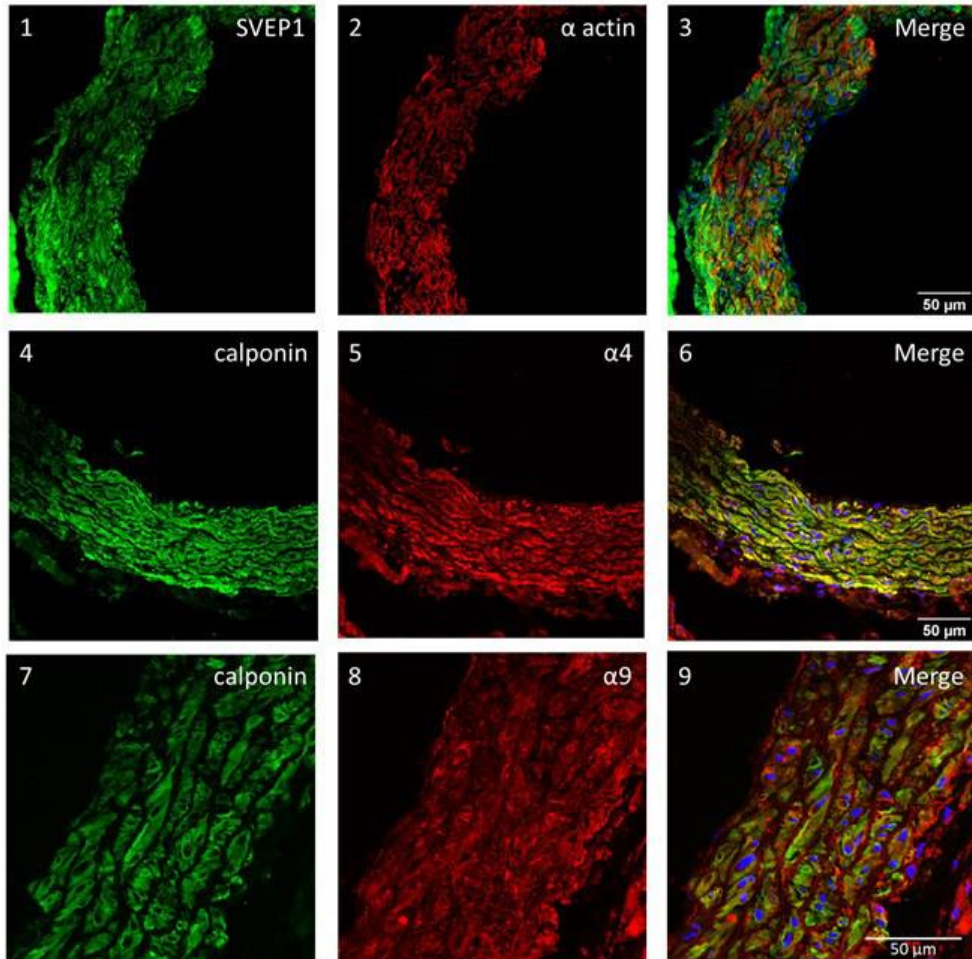

**Supplemental Figure 2. SVEP1, integrin  $\alpha4\beta1$  and integrin  $\alpha9\beta1$  are localised to smooth muscle cell layer**

Dual fluorescent staining of SVEP1 and smooth muscle  $\alpha$ -actin (1-3), integrin  $\alpha4\beta1$  and calponin (4-6), and integrin  $\alpha9\beta1$  and calponin (7-9) in mouse aorta sections. Scale bar indicates 50µm.

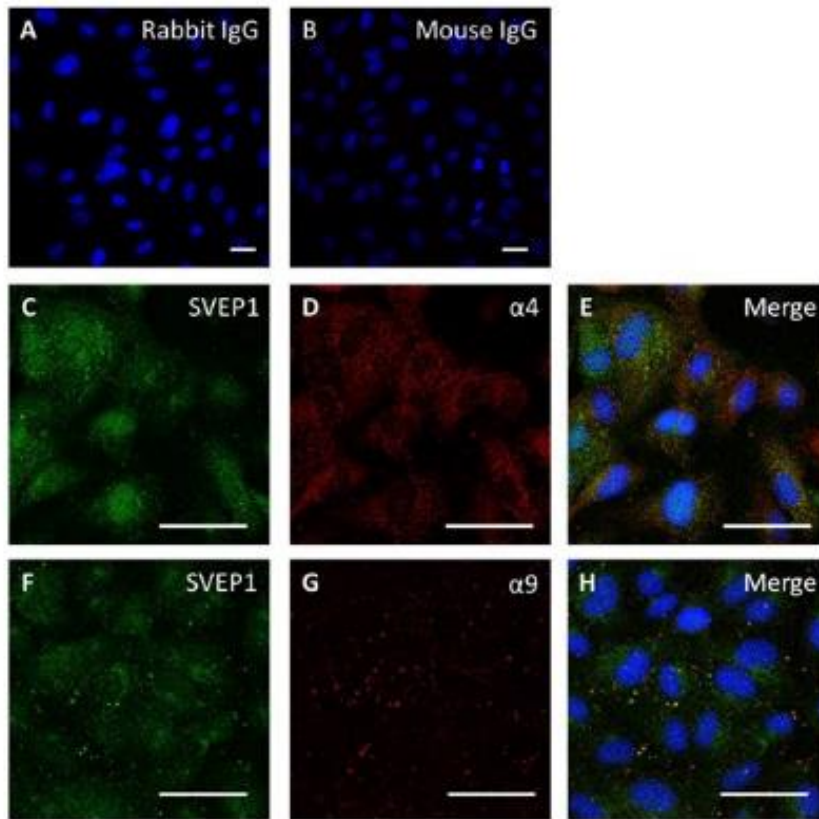

**Supplemental Figure 3: SVEP1, integrin  $\alpha 4\beta 1$  and  $\alpha 9\beta 1$  are expressed on endothelial cells**

(A) HUVECs were fixed and stained with 3  $\mu\text{g}/\text{ml}$  rabbit IgG, or (B) 2  $\mu\text{g}/\text{ml}$  mouse IgG and appropriate secondary antibody. Dual fluorescent staining of SVEP1 (C & E) and integrin  $\alpha 4\beta 1$  (D & E), and SVEP1 (F & H) and integrin  $\alpha 9\beta 1$  (G & H). Scale bar indicates 50  $\mu\text{m}$ .

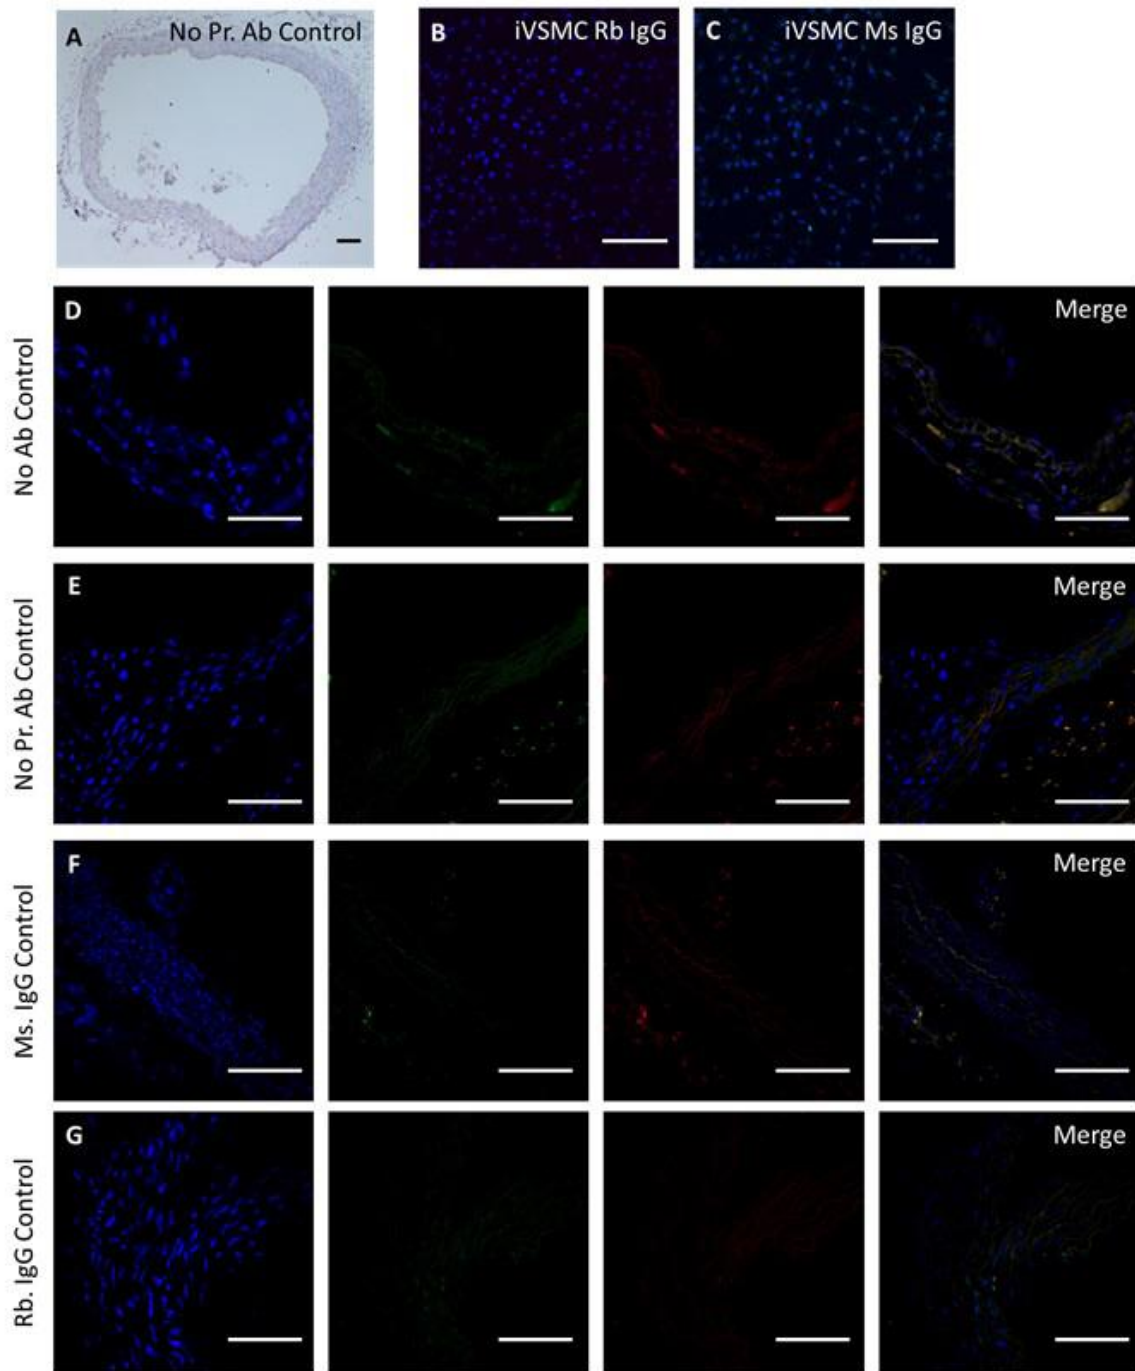

**Supplemental Figure 4: Antibody controls for ICC staining**

(A) Aortic section stained for IHC had no primary antibodies added. iVSMCs were stained with 3  $\mu\text{g}/\text{ml}$  rabbit IgG (B), or 2  $\mu\text{g}/\text{ml}$  mouse IgG (C) and appropriate secondary antibody. Aortic sections were imaged on a confocal microscope using the same laser settings as used for staining. Sections had no antibodies added (D), no primary antibodies (E), Mouse IgG at 2  $\mu\text{g}/\text{ml}$  (F) or rabbit IgG at 3  $\mu\text{g}/\text{ml}$  (G). Scale bar indicates 100  $\mu\text{m}$ .

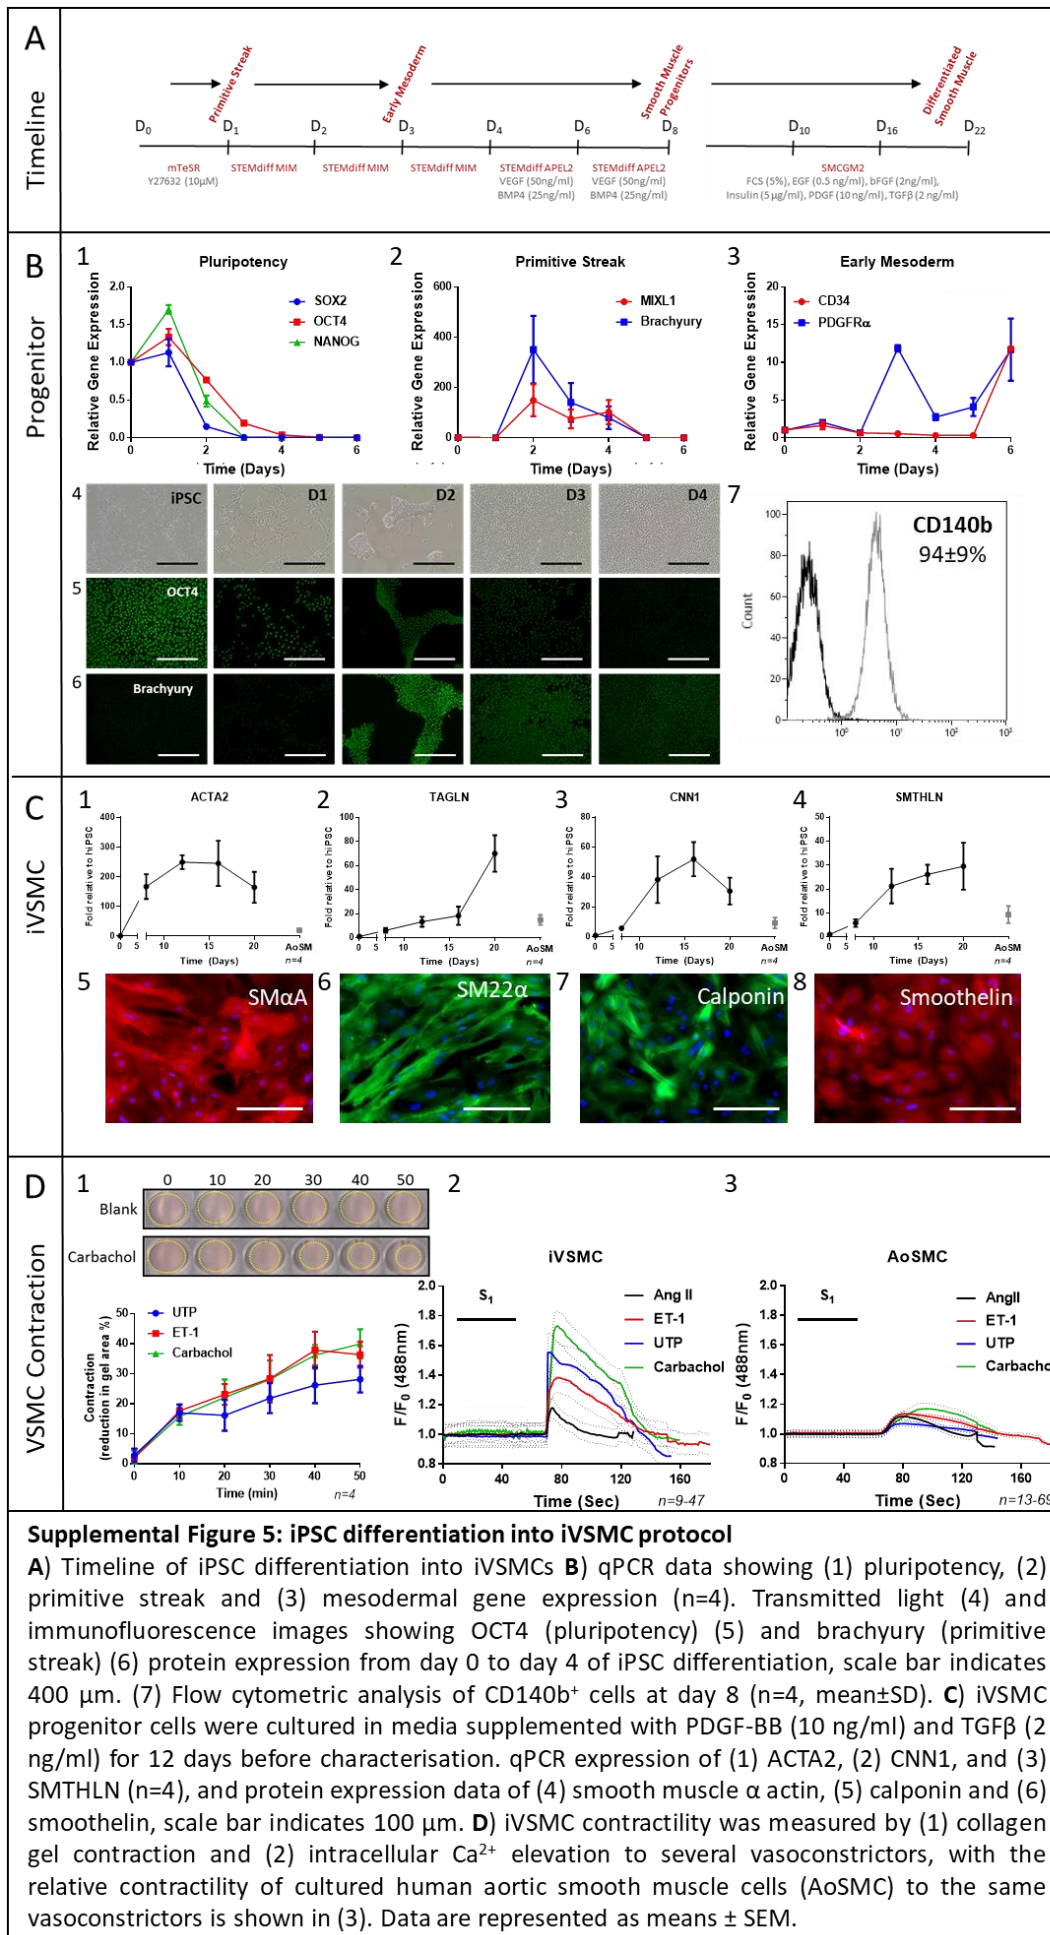

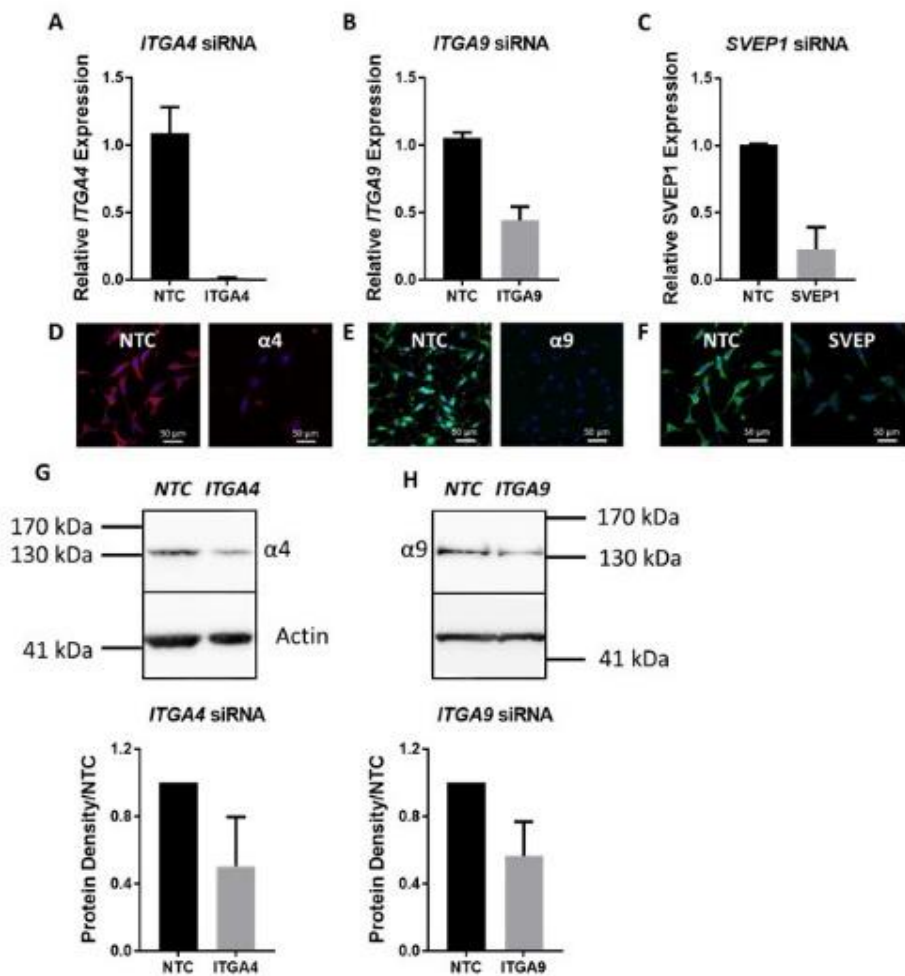

**Supplemental Figure 6: Quantification of *ITGA4*, *ITGA9* and *SVEP1* siRNA treatment**

iVSMCs were transfected with 100 nM of non-targeting control (NTC), *ITGA4*, *ITGA9*, or *SVEP1* siRNA for 48 hrs. Cells were lysed and relative gene expression of *ITGA4* (A, n=4), *ITGA9* (B, n=3), and *SVEP1* (C, n=3) were measured by qRT-PCR and normalised to gene expression in NTC-transfected cells. iVSMCs were fixed and integrin  $\alpha 4$  (D),  $\alpha 9$  (E), and *SVEP1* (F) protein expression was visualised by immunocytochemistry (scale bar indicates 50  $\mu$ m). iVSMCs were lysed and integrin  $\alpha 4$  (G, n=3), and  $\alpha 9$  (H, n=3) protein expression was quantified by densitometry and normalised to protein levels in NTC-transfected cells. Data are represented as means  $\pm$  SD.

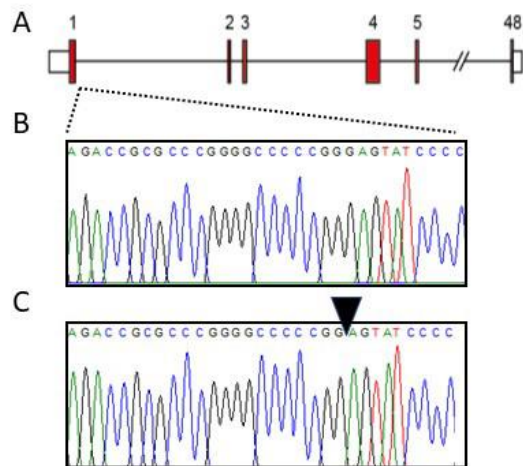

**Supplemental Figure 7. Generation of *SVEP1* knockout iPSCs.**

(A) Truncated schematic of *SVEP1* gene structure. CRISPR guide RNA targeted region in exon 1 of *SVEP1*. (B) *SVEP1* sequencing from parental iPSC line. (C) *SVEP1* exon 1 sequencing from *SVEP1*<sup>-/-</sup> iPSC line with deletion event shown by the black triangle.

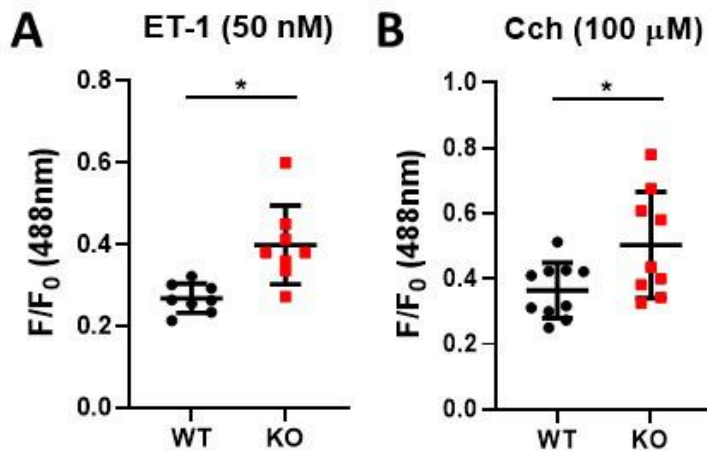

**Supplemental Figure 8: SVEP1<sup>-/-</sup> iVSMCs display elevated [Ca<sup>2+</sup>]<sub>i</sub> to ET-1 or carbachol.**

iVSMCs differentiated from parental wild type (WT) isotype control iPSCs or SVEP1<sup>-/-</sup> knockout (KO) iPSCs were loaded with Fluo3 prior to vasoconstrictor challenge for 45 secs. Maximal fluorescence signal ( $F/F_0$ ) are shown for (A) ET-1 (50 nM, n=8), and (B) Cch (100  $\mu$ M, WT n=10, KO n=9). Data are represented as means  $\pm$  SD, \*  $P < 0.05$ , unpaired  $t$ -test.



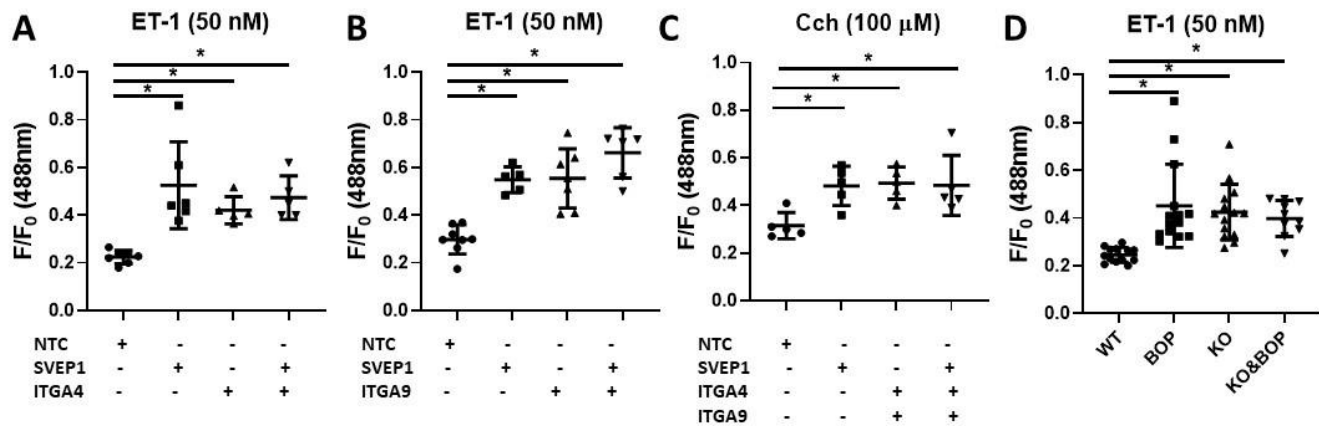

**Supplemental Figure 9: Simultaneous inhibition of SVEP1 and integrin  $\alpha$ 4 or  $\alpha$ 9 does not enhance  $[Ca^{2+}]_i$  elevation to a panel of vasoconstrictors**  
 (A) iVSMCs were treated with non-targeting control (NTC), ITGA4, and SVEP1 siRNA, (B) NTC, ITGA9 and SVEP1 siRNA for 48 hrs prior to Fluo3 loading and ET-1 (50 nM) challenge for 45 secs. (C) iVSMCs were treated with NTC, ITGA4, ITGA9 and SVEP1 siRNA, for 48 hrs prior to Fluo3 loading and carbachol (100  $\mu$ M) challenge for 45 secs. Maximal fluorescence signal ( $F/F_0$ ) are shown (A NTC n=7, SVEP1 n=6, ITGA4, SVEP1&ITGA4 n= 5, B NTC n=8, SVEP1 n=5, ITGA9 n=7, SVEP1&ITGA9 n=6, C all conditions n=5). (D) iVSMCs differentiated from parental wild type (WT) isotype control iPSCs or SVEP1 knockout (KO) iPSCs were treated with the dual integrin  $\alpha$ 4 $\beta$ 1- $\alpha$ 9 $\beta$ 1 inhibitor BOP for 1 hr prior to Fluo3 loading and ET-1 (50 nM) challenge for 45 secs. Maximal fluorescence signal ( $F/F_0$ ) are shown (WT n=13, BOP, KO n=14, KO&BOP n=10). Data are represented as means  $\pm$  SD, \*  $P < 0.05$ , one-way ANOVA followed by Tukey's post hoc test.

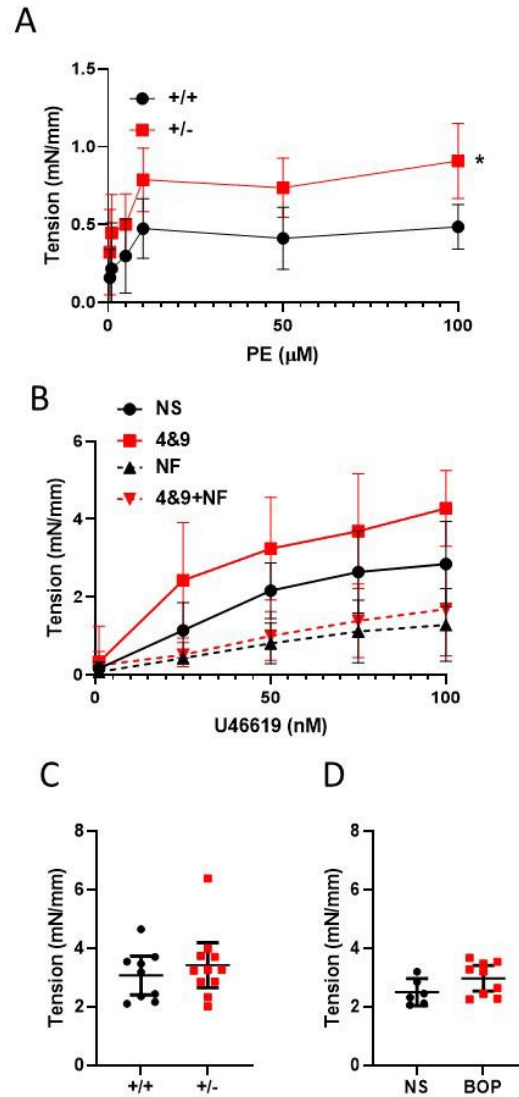

**Supplemental Figure 10: Aortic contraction to vasoconstrictors, direct activation or calcium channel blockage.**

(A) Aortas from *Svep1*<sup>+/-</sup> mice or littermate controls were stimulated with PE and force generation was recorded by wire myography (+/+ n=11, +/- n=15). (B) Aortas from C57BL/6J mice were pre-incubated with integrin  $\alpha 4$  and  $\alpha 9$  blocking antibodies overnight and incubated with the VGCC blocker nifedipine (NF) for 30 minutes prior to U46619 application (n=4). (C) Direct activation of voltage gated calcium channels (VGCCs) was induced by application of a high K<sup>+</sup> solution in aortas from *Svep1*<sup>+/-</sup> mice or littermate controls (+/+ n=9, +/- n=11) and (D) aortas from C57BL/6J mice pre-incubated with the dual integrin  $\alpha 4/\alpha 9$  inhibitor BOP overnight (ns n=6, BOP n=9), with force generation recorded by wire myography. Data are represented as means  $\pm$  SD, \*  $P < 0.05$ , mixed-effects models.
